# Supplementary material for: Efficacy and Safety of Antioxidant Treatment With α-Lipoic Acid Over 4 Years in Diabetic Polyneuropathy: The NATHAN 1 trial
Source: PubMed Central journal article supplement — Diabetes Care. 2011 Aug 19;34(9):2054–60. doi: 10.2337/dc11-0503 (PMC3161301; doi:10.2337/dc11-0503), 2011-08-19
Supplement: supp_dc11-0503v110503_DC110503SupplementaryData.pdf [file supp_dc11-0503v110503_DC110503SupplementaryData.pdf]

**NATHAN 1 Trial: Participating centers**

*US/Canada:* Jackie R. See, Arthur Charles, Tustin, CA; Jerry Nadler, Duarte, CA; Mark H. Tuszynski, San Diego, CA; Roy Freeman, Boston, MA; Miriam Freimer, Columbus, OH; Jeremy Gleeson, Albuquerque, NM; Michael Giuliani, Pittsburgh, PA; Douglas A. Greene, Ann Arbor, MI; Greg Gruener, Maywood, IL; Yadollah Harati, Houston, TX; Steven Horowitz, Columbia, MO; Peter Lodewick, Birmingham, AL; Adi Mehta, Cleveland, OH; Richard Olney, San Francisco, CA; Winfried Raabe, Minneapolis, MN; M. Perley, Long Beach, CA; Michael A. Pfeifer, Greenville, NC; Philip Raskin, Dallas, TX; Marc Rendell, Omaha, NE; Julio Rosenstock, Dallas, TX; Michael Rubin, New York, NY; Sherwyn Schwartz, San Antonio, TX; J. Clarke Stevens, Scottsdale, AZ; Aaron I. Vinik, Norfolk, VA; Bruce Zimmermann, Rochester, MN.

*Europe:* Andrew J.M. Boulton, Manchester, UK; Jean-Raymond Attali, Bondy, France; Domenico Fedele, Padova, Italy; Dario Giugliano, Napoli, Italy; Carlo Coscelli, Parma, Italy; Miroslav Reljanovic, Ante Bilic, Zagreb, Croatia; P. Sytze van Dam, Utrecht, The Netherlands; Göran Sundkvist, Malmö, Sweden; Jannik Hilsted, Hvidovre, Denmark; José Cabezas-Cerrato, Santiago de Compostela, Spain; José M. Espadaler, R. Gomis, H. Odriozola, Barcelona, Spain.

**Steering committee:** Peter J. Dyck (coordinator), Rochester, MN; Andrew J.M. Boulton, Manchester, UK; Douglas A. Greene, Ann Arbor, MI; William J. Litchy, Rochester, MN; Philip A. Low, Rochester, MN; Peter O'Brien, Rochester, MN; Michael A. Pfeifer, Greenville, NC; Dan Ziegler, Düsseldorf, Germany.

**Statistical analysis and reporting:** Barbara Eilers-Lenz, Marcel Machiewicz, SIRO Clinpharm (formerly Omega Mediation), Offenbach, Germany; Ullrich Munzel, Hanna Michalke, Joachim Maus, Michael Necker, MEDA, Bad Homburg, Germany.

**Supervisory committee:** F. Arnold Gries, Düsseldorf, Germany; John Lachin, Rockville, MD; John D. Ward, Sheffield, UK.

**Sponsor:** MEDA GmbH & Co. KG, Bad Homburg, Germany

SUPPLEMENTARY DATA

**Supplementary Table 1.** Safety analysis: incidences by body system class

| <b>Body system class</b>                        | <b><math>\alpha</math>-Lipoic acid (n/%)<br/>n=231</b> | <b>Placebo (n/%)<br/>n=225</b> | <b>P value</b> |
|-------------------------------------------------|--------------------------------------------------------|--------------------------------|----------------|
| Heart rate and rhythm disorders                 | 16 (6.9)                                               | 6 (2.7)                        | 0.047          |
| Urinary system disorders                        | 51 (22.1)                                              | 34 (15.1)                      | 0.071          |
| Myo-, endo-, pericardial and valve disorders    | 29 (12.6)                                              | 17 (7.6)                       | 0.088          |
| Respiratory system disorders                    | 107 (46.3)                                             | 90 (40.0)                      | 0.186          |
| Body as a whole                                 | 110 (47.6)                                             | 93 (41.3)                      | 0.188          |
| Cardiovascular disorders, general               | 81 (35.1)                                              | 69 (30.7)                      | 0.321          |
| Musculo-skeletal system disorders               | 90 (39.0)                                              | 77 (34.2)                      | 0.331          |
| Secondary terms                                 | 108 (46.8)                                             | 95 (42.2)                      | 0.347          |
| Autonomic nervous system disorders              | 12 (5.2)                                               | 7 (3.1)                        | 0.350          |
| Application site disorders                      | 23 (10.0)                                              | 18 (8.0)                       | 0.515          |
| Gastro-intestinal disorders                     | 80 (34.6)                                              | 74 (32.9)                      | 0.766          |
| Metabolic and nutritional disorders             | 84 (36.4)                                              | 80 (35.6)                      | 0.922          |
| Neoplasm                                        | 14 (6.1)                                               | 12 (5.3)                       | 0.841          |
| Psychiatric disorders                           | 26 (11.3)                                              | 25 (11.1)                      | 1.000          |
| Platelet, bleeding and clotting disorders       | 13 (5.6)                                               | 13 (5.8)                       | 1.000          |
| Central and peripheral nervous system disorders | 64 (27.7)                                              | 66 (29.3)                      | 0.756          |
| Vascular (extracardiac) disorders               | 26 (11.3)                                              | 30 (13.3)                      | 0.569          |
| Resistance mechanism disorders                  | 43 (18.6)                                              | 48 (21.3)                      | 0.484          |
| Skin and appendages disorders                   | 81 (35.1)                                              | 90 (40.0)                      | 0.289          |
| Vision disorders                                | 30 (13.0)                                              | 41 (18.2)                      | 0.155          |

SUPPLEMENTARY DATA

**Supplementary Table 2:** Safety analysis: individual cardiovascular disorders.

|                                                                    | <b>α-Lipoic acid (n/%)<br/>n=231</b> | <b>Placebo (n/%)<br/>n=225</b> | <b>P value</b> |
|--------------------------------------------------------------------|--------------------------------------|--------------------------------|----------------|
| <b>Heart rate and rhythm disorders</b>                             |                                      |                                |                |
| Tachycardia                                                        | 7 (3.0)                              | 2 (0.9)                        | 0.176          |
| Arrhythmia                                                         | 4 (1.7)                              | 0                              | 0.123          |
| Palpitation                                                        | 2 (0.9)                              | 1 (0.4)                        | 1.000          |
| AV block                                                           | 1 (0.4)                              | 0                              | 1.000          |
| Bradycardia                                                        | 1 (0.4)                              | 0                              | 1.000          |
| Cardiac arrest                                                     | 1 (0.4)                              | 0                              | 1.000          |
| Tachycardia ventricular                                            | 1 (0.4)                              | 0                              | 1.000          |
| Bundle branch block                                                | 0                                    | 1 (0.4)                        | 1.000          |
| Extrasystoles                                                      | 0                                    | 1 (0.4)                        | 1.000          |
| <b>Myocardial, endocardial, or pericardial and valve disorders</b> |                                      |                                |                |
| Coronary artery disorder                                           | 13 (5.6)                             | 6 (2.7)                        | 0.159          |
| Angina pectoris                                                    | 6 (2.6)                              | 3 (1.3)                        | 0.504          |
| Myocardial infarction                                              | 9 (3.9)                              | 6 (2.7)                        | 0.602          |
| Coronary thrombosis                                                | 1 (0.4)                              | 0                              | 1.000          |
| Myocardial ischemia                                                | 3 (1.3)                              | 5 (2.2)                        | 0.499          |

**Supplementary Table 3:** Global assessment of treatment tolerability.

|                          |               | <b>Very good/good<br/>n (%)</b> | <b>Satisfactory<br/>n (%)</b> | <b>Insufficient<br/>n (%)</b> |
|--------------------------|---------------|---------------------------------|-------------------------------|-------------------------------|
| <b>End of<br/>year 2</b> | Investigators | ALA<br>132 (57.1)               | 65 (28.1)                     | 5 (2.2)                       |
|                          | Placebo       | 123 (54.7)                      | 63 (28.0)                     | 7 (3.1)                       |
|                          | Patients      | ALA<br>131 (56.7)               | 59 (26.2)                     | 6 (2.6)                       |
|                          | Placebo       | 118 (52.4)                      | 47 (26.7)                     | 9 (4.0)                       |
| <b>End of<br/>year 4</b> | Investigators | ALA<br>108 (70.1)               | 41 (26.6)                     | 5 (3.3)                       |
|                          | Placebo       | 102 (66.2)                      | 45 (29.2)                     | 7 (4.6)                       |
|                          | Patients      | ALA<br>109 (71.2)               | 39 (25.5)                     | 5 (3.3)                       |
|                          | Placebo       | 98 (63.6)                       | 47 (30.5)                     | 9 (5.8)                       |
